# Supplementary material for: Printable ultrathin substrates formed on a concave–convex underlayer for highly flexible membrane-type electrode stickers
Source: Royal Society of Chemistry journal article supplement (doi:10.1039/c2sm25637a), 2012-01-01
Supplement: c2sm25637a.pdf [file c2sm25637a.pdf]

## **Electronic Supplementary Information**

### **Printable Ultrathin Substrates Formed on a Concave/Convex Underlayer for Highly Flexible Membrane-Type Electrode Stickers**

Youngkyu Hwang, Hyun A Cho, Suk Ho Kim, Hun Soo Jang, Yujun Hyun, Jae-Yi Chun,  
Seong-Ju Park and Heung Cho Ko\*

School of Materials Science and Engineering, Gwangju Institute of Science and Technology  
(GIST), 261 Cheomdan-gwagiro, Buk-gu Gwangju, 500-712, South Korea.

\* Corresponding authors: [heungcho@gist.ac.kr](mailto:heungcho@gist.ac.kr)

### Fabrication of printable ultrathin polymer platelets on a handling substrate with circular concavities

Depth: 2.8  $\mu\text{m}$

Pitch: 20  $\mu\text{m}$

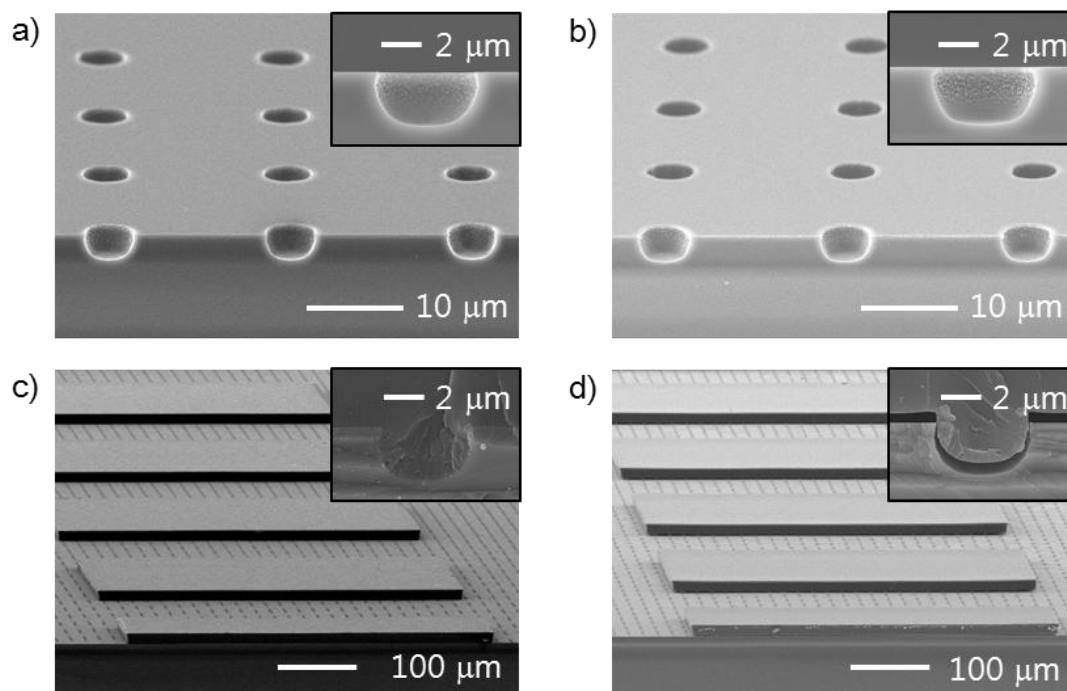

**Figure S1:** a, b) SEM images of circular concavities on silicon wafer chips after RIE etching (these images correspond to the step in Fig. 1b) and deposition of a 200-nm-thick SiO<sub>2</sub> layer (step Fig. 1c). c, d) SEM images of ultrathin square polymer islands (SU-8 in this image) after coating and patterning a polymer layer (step Fig. 1d) and etching the SiO<sub>2</sub> layer in HF solution (step Fig. 1e). The insets in (a-d) show the corresponding cross-sectional views.

### Fabrication of printable ultrathin polymer platelets on a handling substrate with cross-shaped concavities

Depth: 2.9  $\mu\text{m}$

Pitch: 30  $\mu\text{m}$

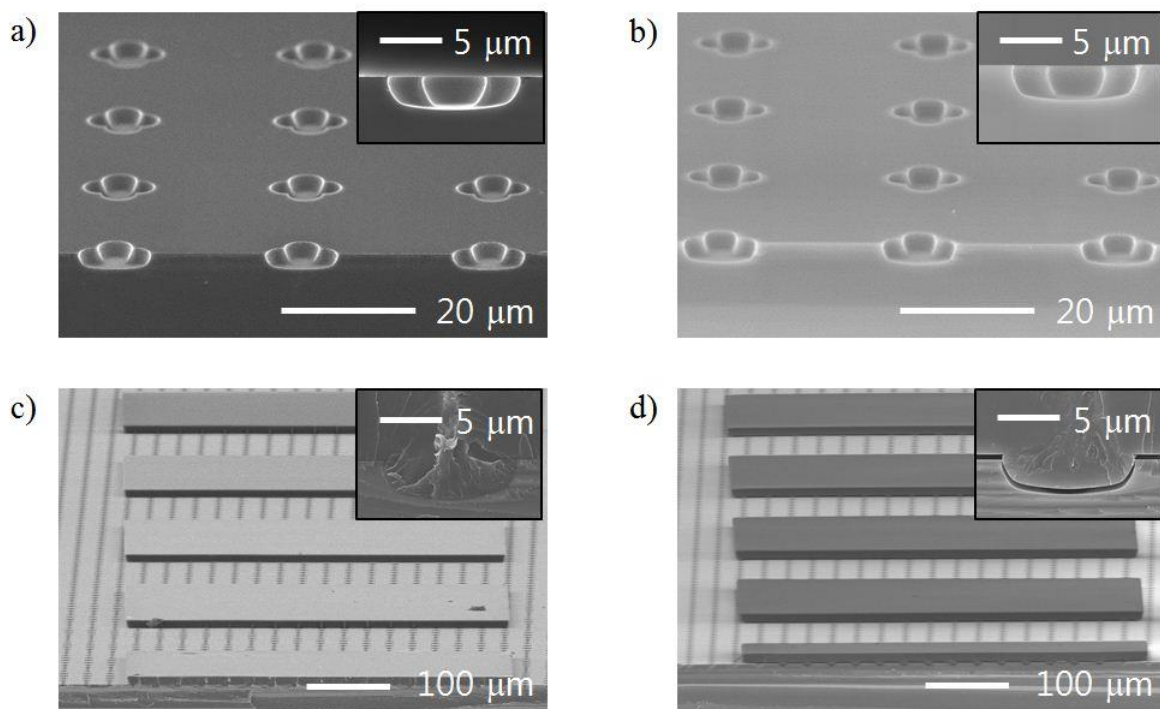

**Figure S2:** a, b) SEM images of cross-shaped concavities on silicon wafer chips after RIE etching (these images correspond to the step in Fig. 1b) and deposition of a 200-nm-thick SiO<sub>2</sub> layer (step Fig. 1c). c, d) SEM images of ultrathin square polymer islands (SU-8 in this image) after coating and patterning a polymer layer (step Fig. 1d) and etching the SiO<sub>2</sub> layer in HF solution (step Fig. 1e). The insets in (a-d) show the corresponding cross-sectional views.

### Alignment degree and transfer yield vs. concavity depth

Pitch: 20  $\mu\text{m}$

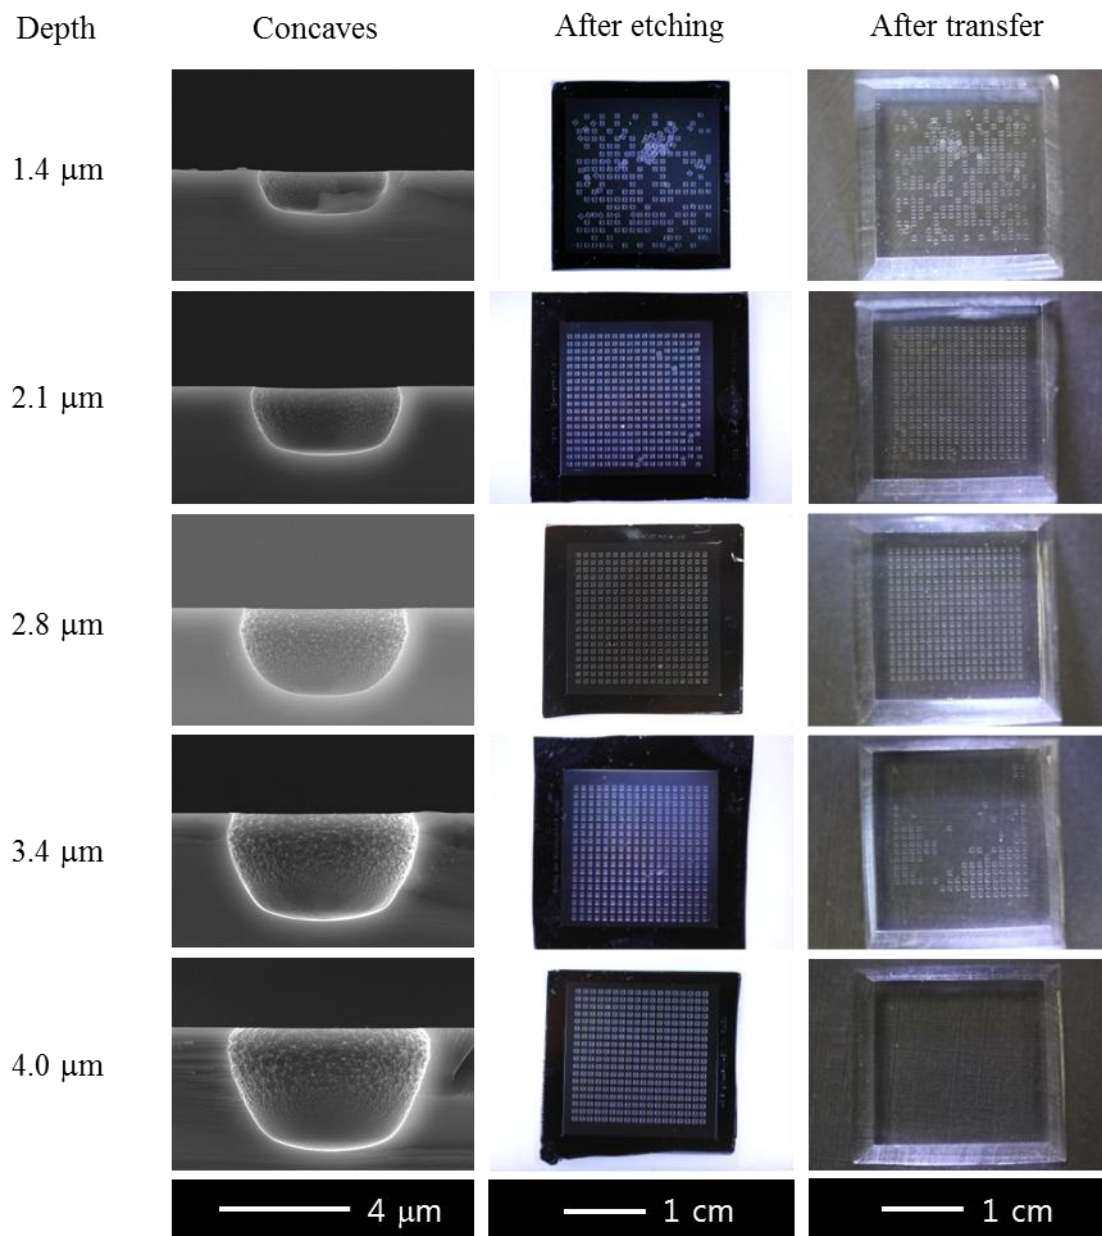

**Figure S3:** (Left column) Cross-sectional SEM images of silicon substrates with concavities of various sizes. (Middle column) Photographs of printable polymer island patterns after etching the sacrificial  $\text{SiO}_2$  layer in HF solution. (Right column) Photographs of polymer island patterns on PDMS slabs after transfer printing.

### Alignment degree and transfer yield vs. the pitch of circular concavities

Depth: 2.8  $\mu\text{m}$

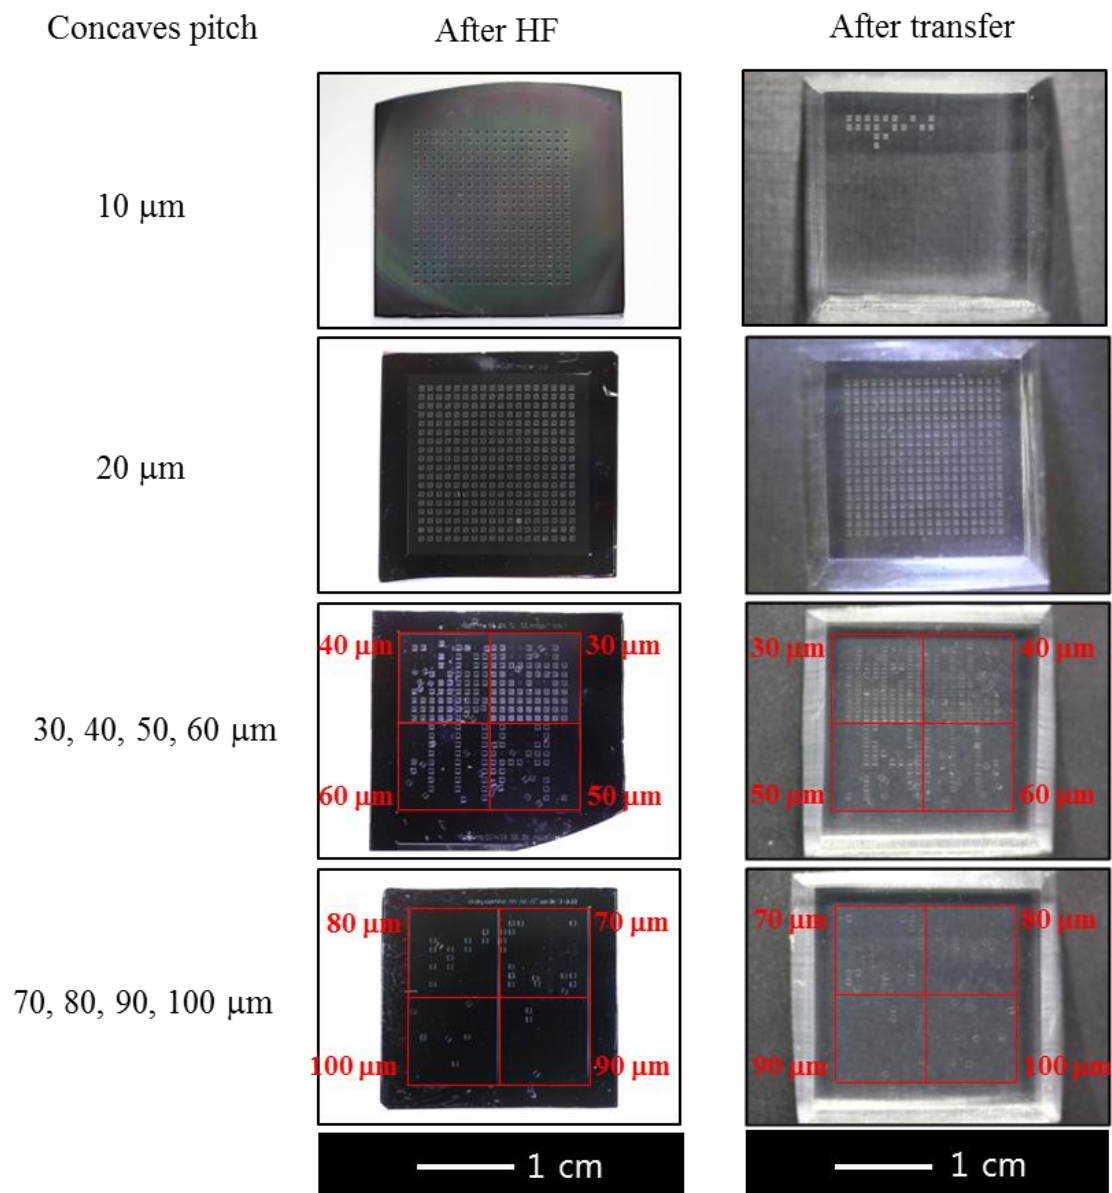

**Figure S4:** (Left column) Photographs of printable polymer island patterns after etching the sacrificial  $\text{SiO}_2$  layer in HF solution. (Right column) Photographs of polymer island patterns on PDMS slabs after transfer printing.

### Alignment degree and transfer yield vs. the pitch of cross-shaped concavities

Depth: 2.9  $\mu\text{m}$

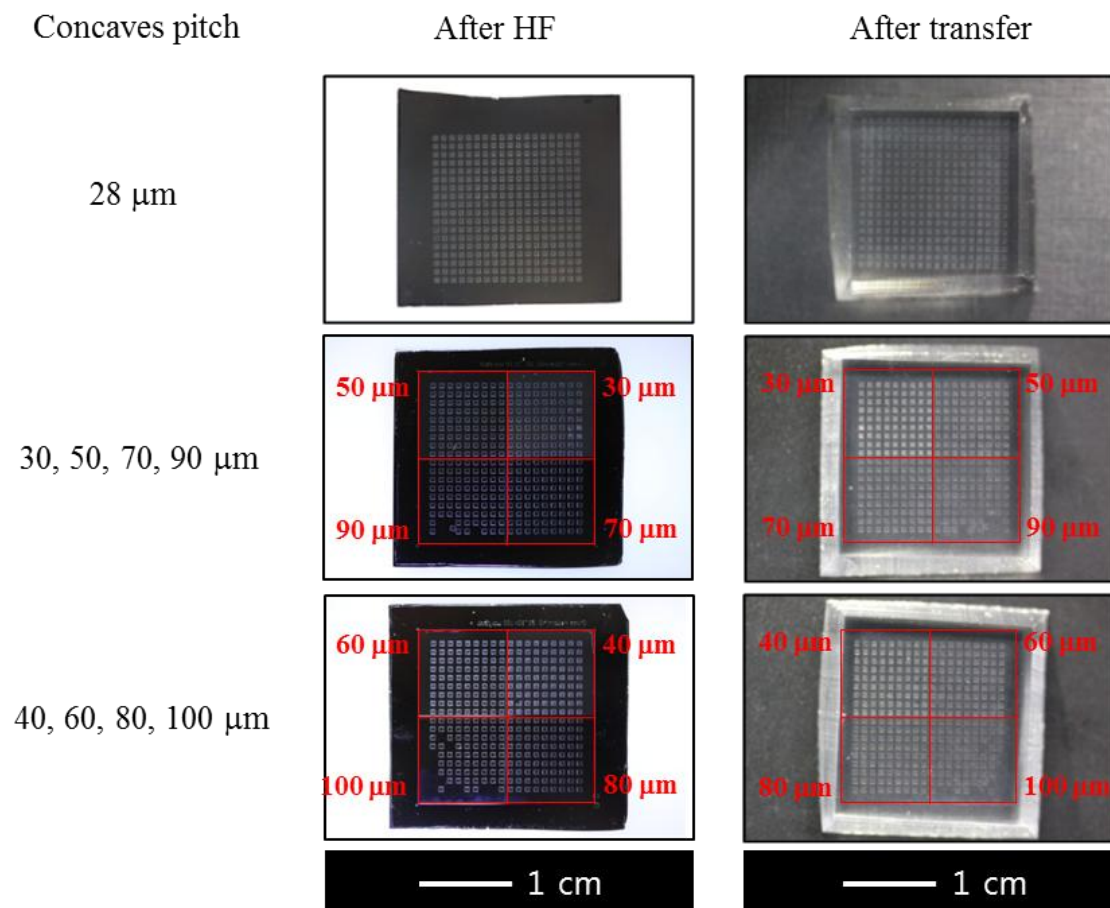

**Figure S5:** (Left column) Photographs of printable polymer island patterns after etching the sacrificial  $\text{SiO}_2$  layer in HF solution. (Right column) Photographs of polymer island patterns on PDMS slabs after transfer printing.

### Alignment degree and transfer yield vs. the pitch of circular concavities

- Depth: 4.0  $\mu\text{m}$

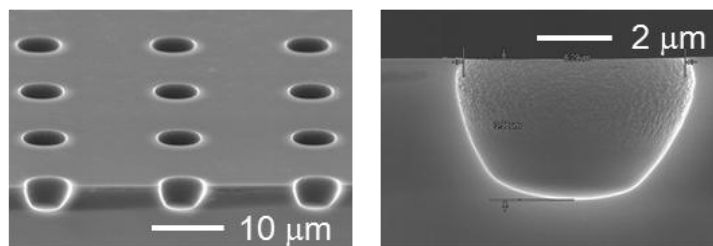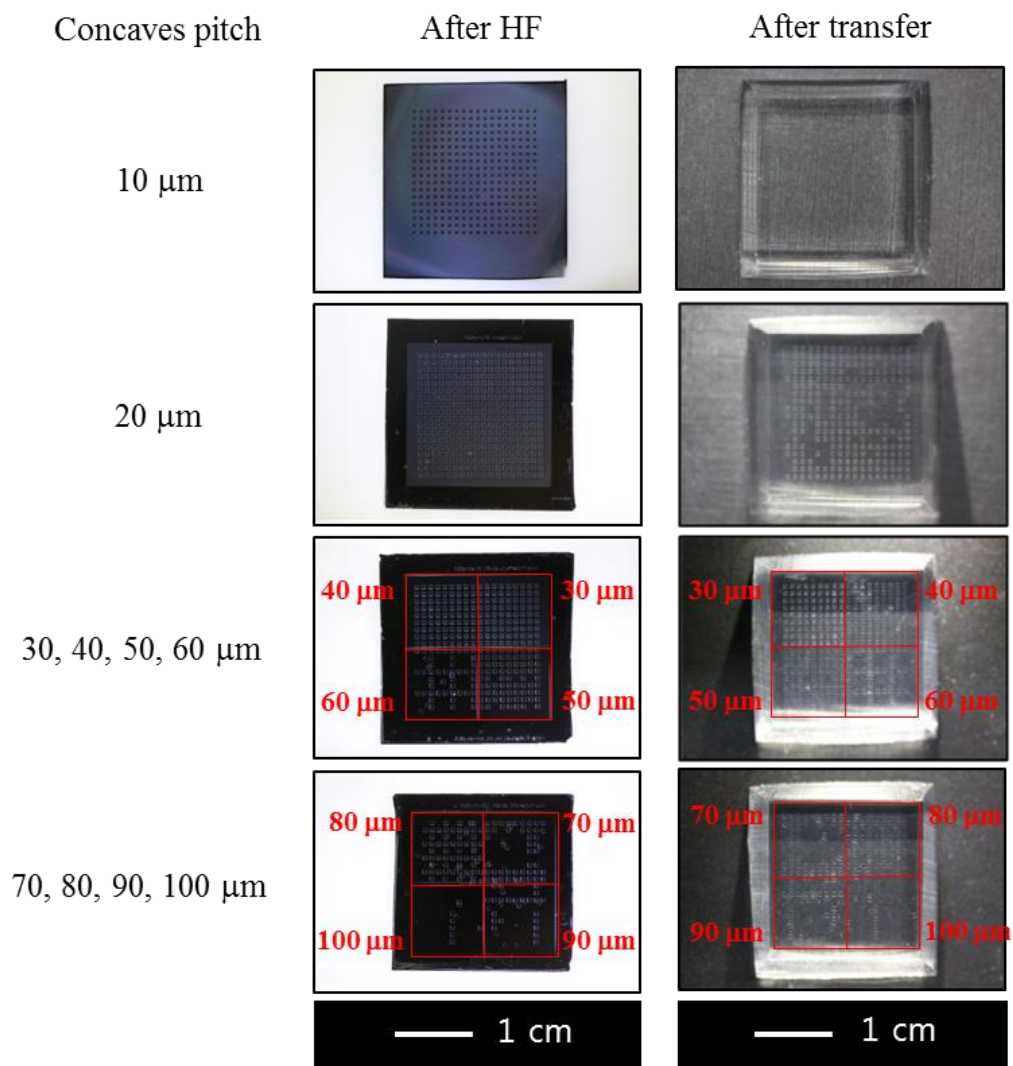

**Figure S6:** (Top) Cross-sectional SEM images of silicon substrates with circular concavities. (Bottom left) Photographs of printable polymer island patterns after etching the sacrificial  $\text{SiO}_2$  layer in HF solution. (Bottom right) Photographs of polymer island patterns on PDMS slabs after transfer printing.

### Alignment degree and transfer yield vs. the pitch of circular concavities

- Depth: 4.8  $\mu\text{m}$

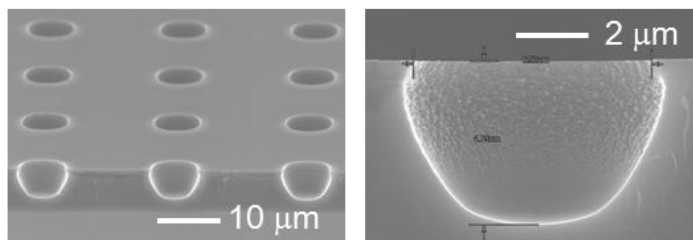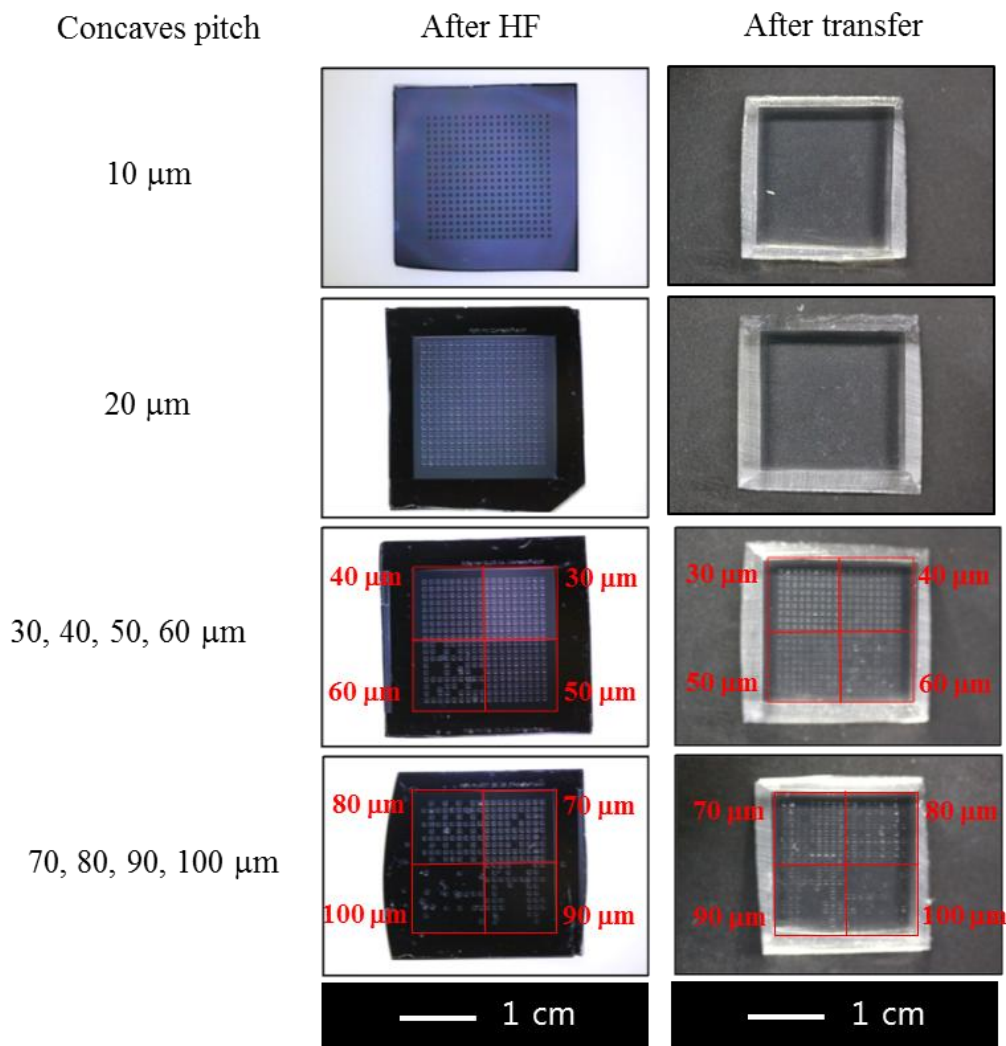

**Figure S7:** (Top) Cross-sectional SEM images of silicon substrates with circular concavities. (Bottom left) Photographs of printable polymer island patterns after etching the sacrificial  $\text{SiO}_2$  layer in HF solution. (Bottom right) Photographs of polymer island patterns on PDMS slabs after transfer printing.



**Alignment degree and transfer yield vs. the pitch of cross-shaped concavities**

- Depth: 4.7  $\mu\text{m}$

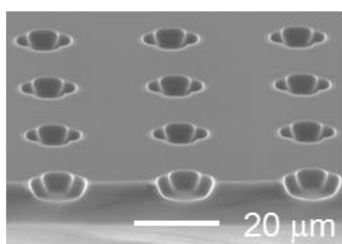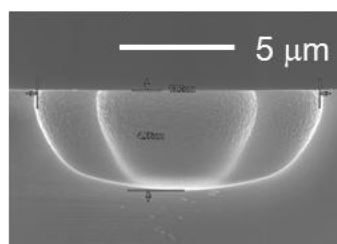

Concaves pitch

After HF

After transfer

28  $\mu\text{m}$

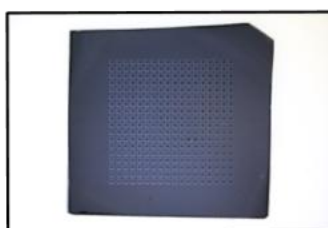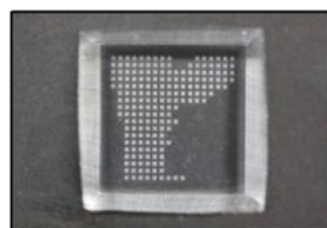

30, 50, 70, 90  $\mu\text{m}$

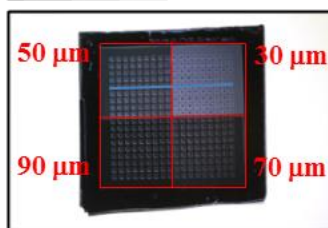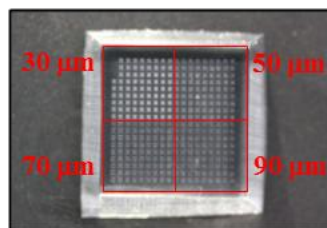

40, 60, 80, 100  $\mu\text{m}$

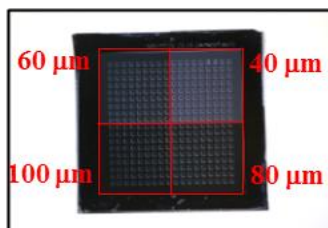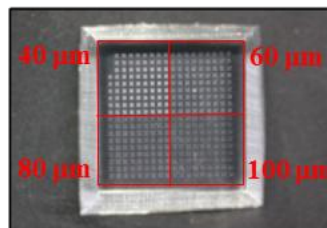

— 1 cm

— 1 cm

**Figure S8:** (Top) Cross-sectional SEM images of silicon substrates with cross-shaped concavities. (Bottom left) Photographs of the printable polymer island patterns after etching the sacrificial  $\text{SiO}_2$  layer in HF solution. (Bottom right) Photographs of polymer island patterns on PDMS slabs after transfer printing.

### Alignment degree and transfer yield vs. the thickness of the printable ultrathin polymer substrate

Depth: 2.8  $\mu\text{m}$

Pitch: 28  $\mu\text{m}$

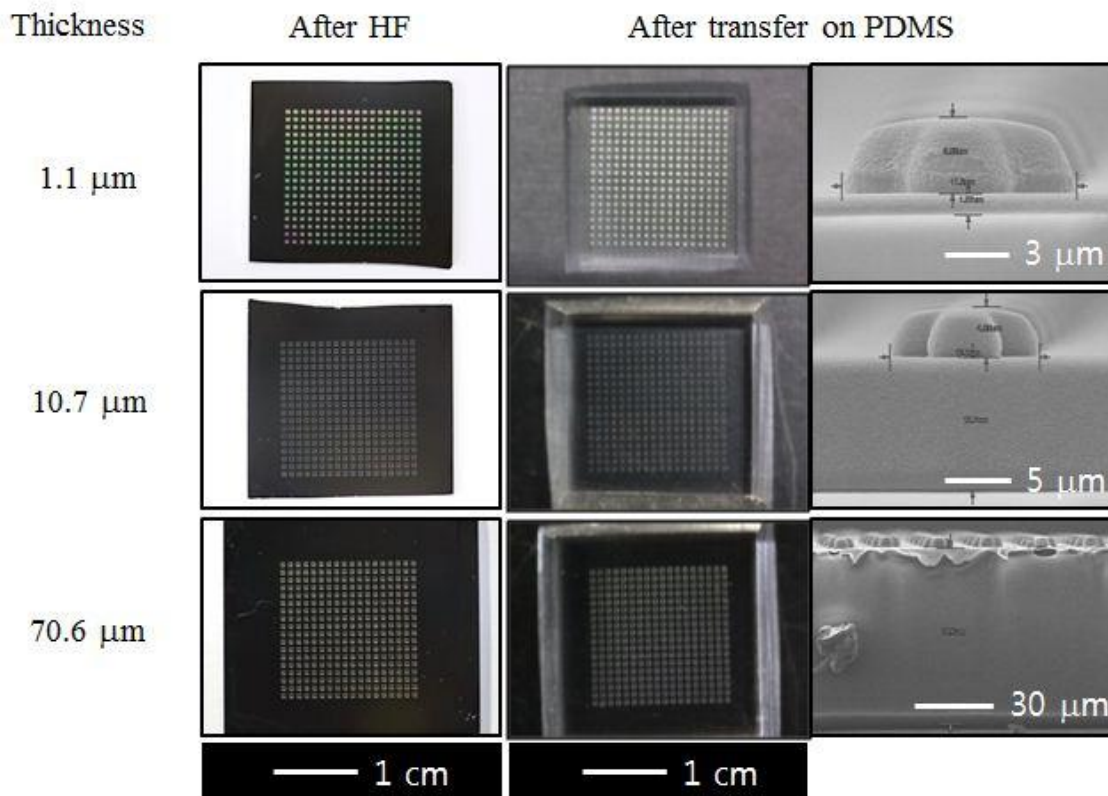

| Thickness ( $\mu\text{m}$ ) | Before and after transfer (%) |                |
|-----------------------------|-------------------------------|----------------|
|                             | Alignment                     | Transfer yield |
| 1.07                        | 100                           | 100            |
| 10.7                        | 100                           | 100            |
| 70.6                        | 100                           | 100            |

**Figure S9:** (Left column) Photographs of printable polymer island patterns after etching the sacrificial  $\text{SiO}_2$  layer in HF solution. (Middle column) Photographs of polymer island patterns on PDMS slabs after transfer printing. (Right column) Cross-sectional SEM images of polymer islands with cross-shaped convexities. (Bottom) Table showing the alignment degree and transfer yield vs. the thickness of the ultrathin polymer substrate.

### Recycling test using a single silicon wafer for transfer printing

Depth: 4.0  $\mu\text{m}$

Pitch: 30  $\mu\text{m}$

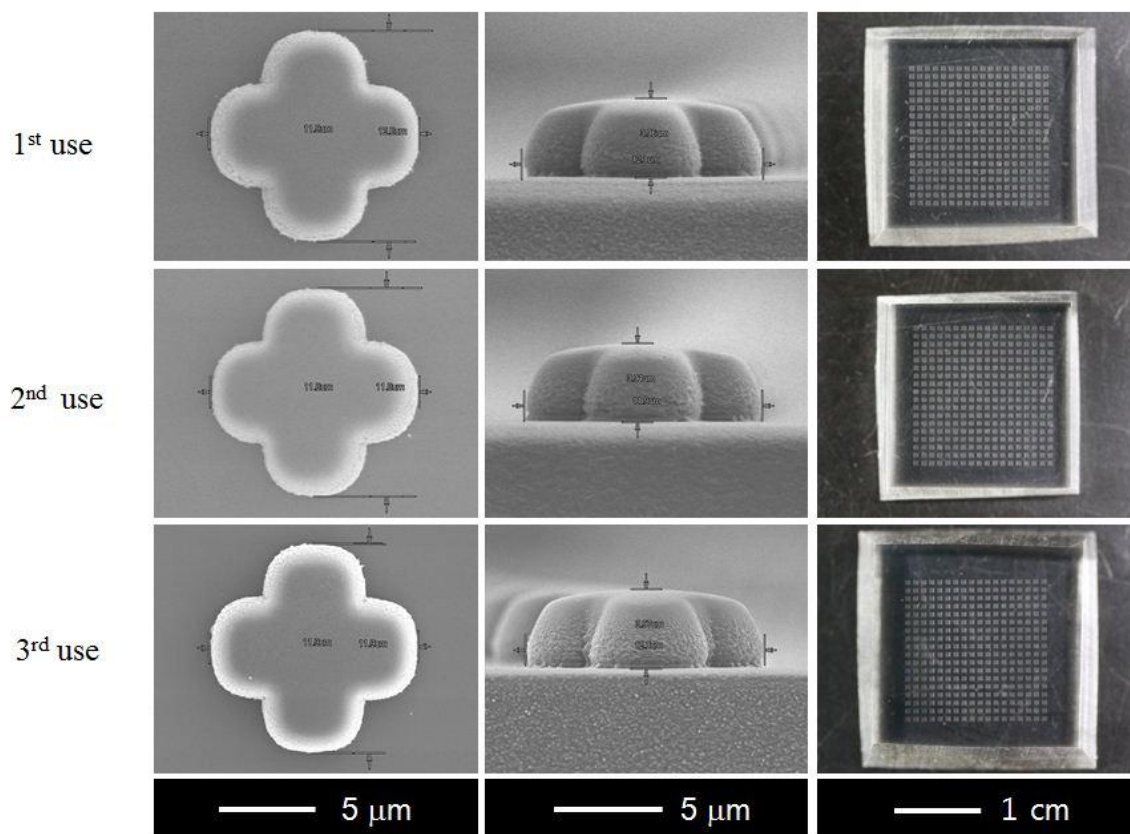

**Figure S10:** Top view and cross-sectional SEM images and photographs of the printable island patterns transferred onto PDMS.

**Alignment of polymer island patterns before and after transfer printing using roller- and slab-type stamps**

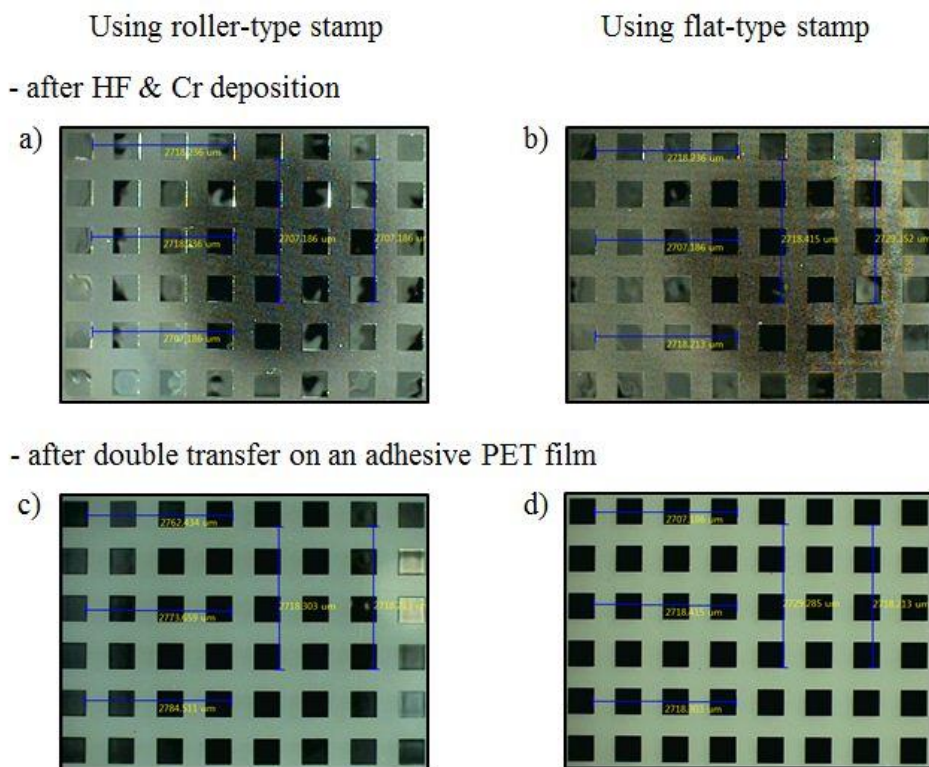

| PDMS type | Direction | After HF & Cr deposition | After double transfer on an adhesive PET film | Deformation Rate (%) |
|-----------|-----------|--------------------------|-----------------------------------------------|----------------------|
| Roller    | x         | 2714.6 μm                | 2773.5 μm                                     | 2.20                 |
|           | y         | 2707.2 μm                | 2718.3 μm                                     | 0.41                 |
| Flat      | x         | 2714.5 μm                | 2714.6 μm                                     | 0.00                 |
|           | y         | 2723.9 μm                | 2723.7 μm                                     | -0.01                |

**Figure S11:** (a, b) OM images of printable polymer island arrays on silicon handling substrates before transfer printing. (c, d) OM images of printed polymer island arrays on adhesive PET films using (c) roller-type and (d) slab-type PDMS stamps. For better contrast in the OM images, 100 nm Cr was deposited on the polymer islands.

**Durability test with various chemicals**

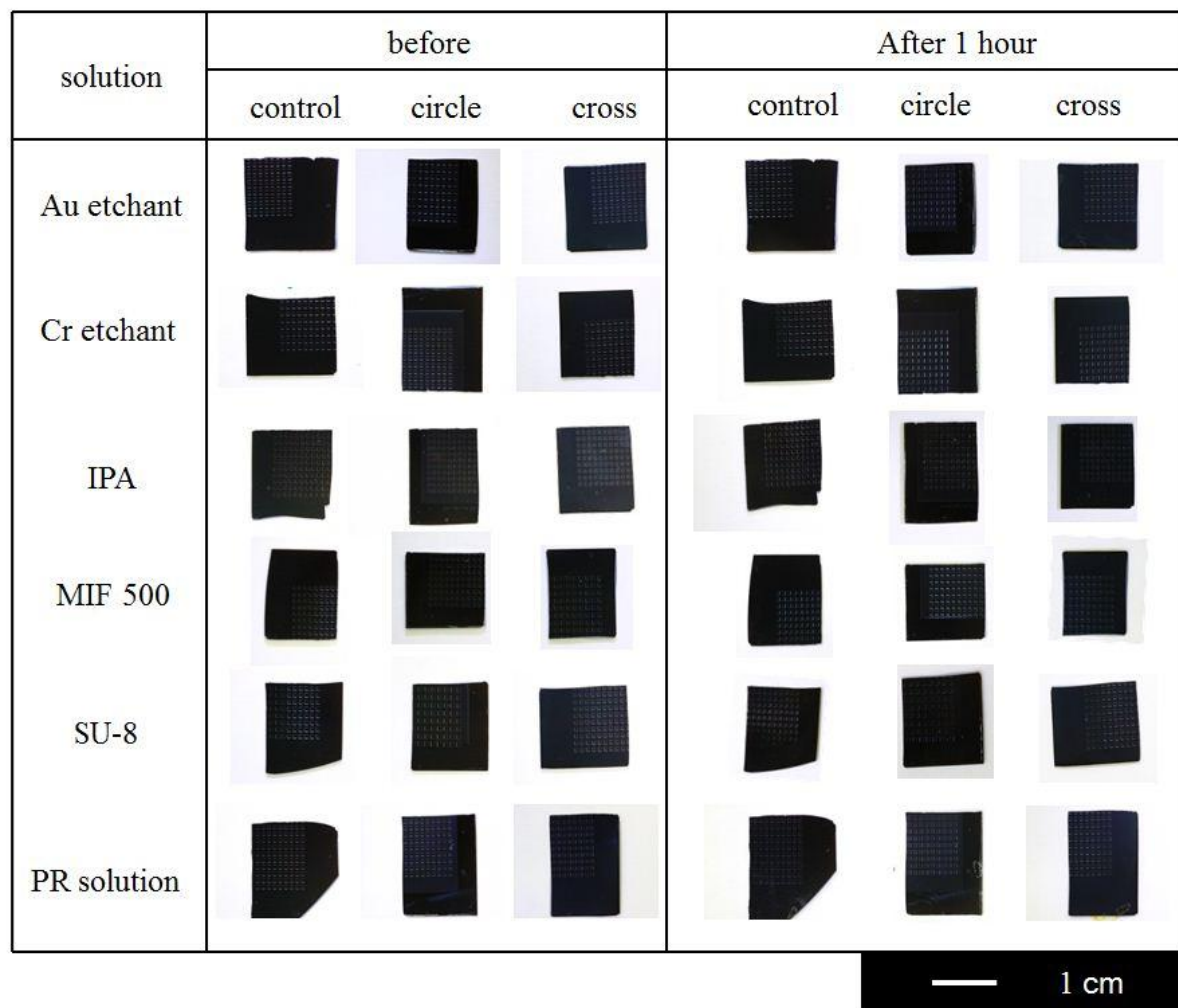

**Figure S12:** Durability test with various chemicals using square ( $500\ \mu\text{m} \times 500\ \mu\text{m}$ ) island arrays of polymer substrate. The depth and pitch are  $3\ \mu\text{m}$  and  $28\ \mu\text{m}$ , respectively.

**Printable ultrathin polymer platelets on a handling substrate with circular concavities**

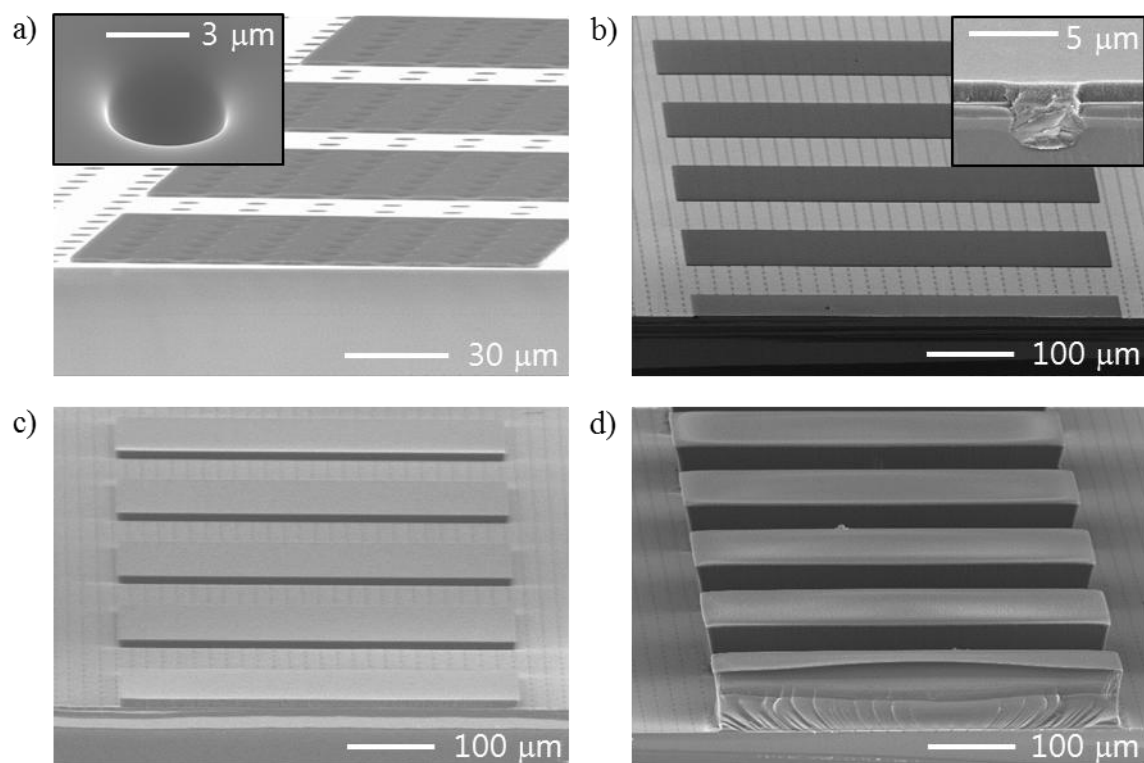

**Figure S13:** a-d) SEM images of ultrathin square islands of (a) polyimide and (b-d) SU-8 after coating and patterning a polymer layer (step Fig. 1d). The insets in (a, b) show tilted and cross-sectional views, respectively, at high magnification. The thicknesses of the ultrathin polymer substrates in a, b, c, and d are 1.2 μm, 1.4 μm, 10.4 μm, and 72.4 μm, respectively.

**Process used for transfer printing of ultrathin polymer islands onto a curvilinear surface**

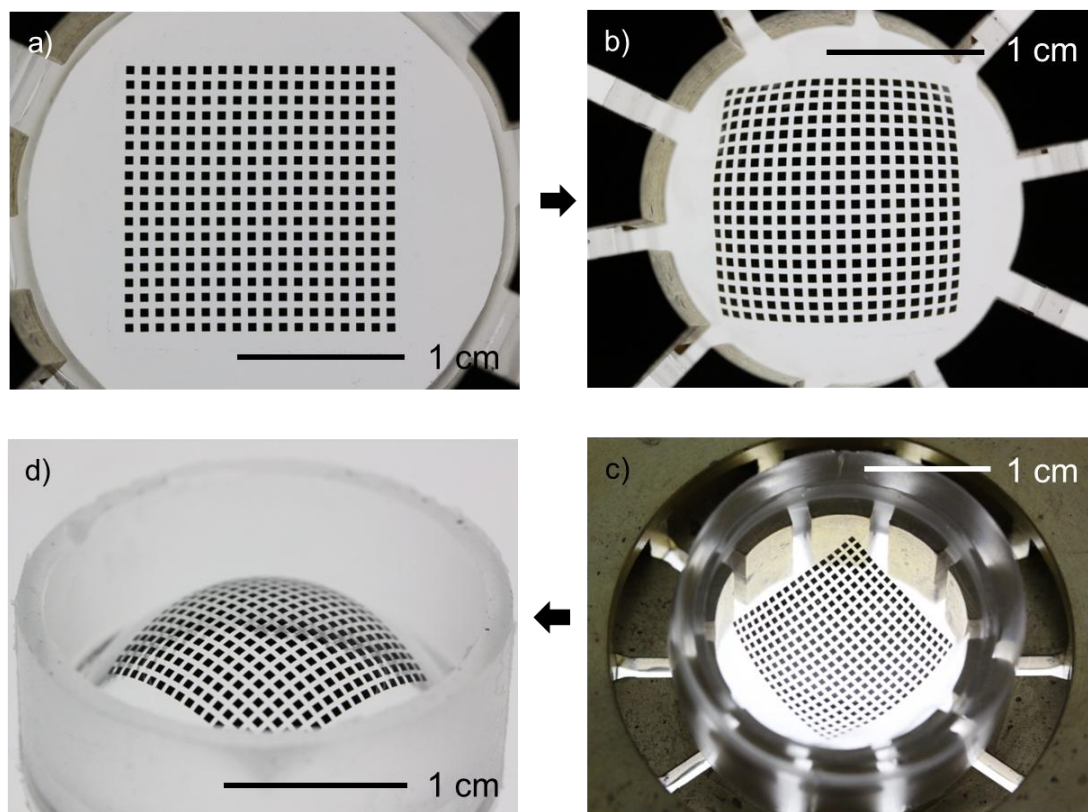

**Figure S14:** OM images of the transfer printing process using printable ultrathin polymer arrays with a square pattern onto a hemispherical convex PDMS membrane. a) Polymer island pattern transferred onto a flat PDMS membrane using a tensional stage. b, c) Both sides of the PDMS membrane after relaxing the tension. d) PDMS membrane with polymer pattern after removing the stage.

**Lateral geometry of a highly flexible ultrathin serpentine metal electrode**

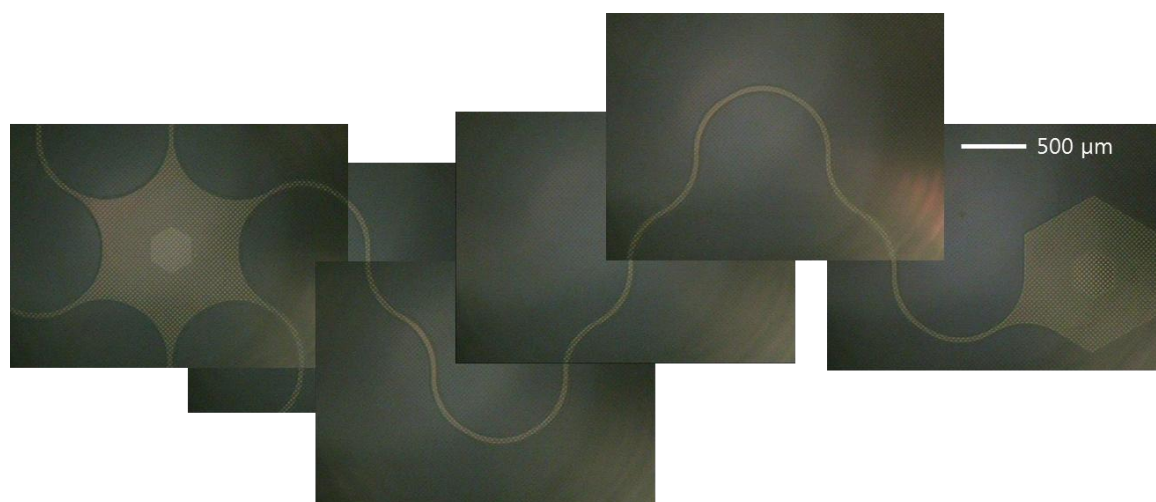

**Figure S15:** Tiled OM images of an ultrathin metal electrode between two contact pads on a silicon handling wafer before removing the sacrificial layer.



### Durability test of a highly flexible ultrathin serpentine metal electrode under 3-dimensional tensile strain

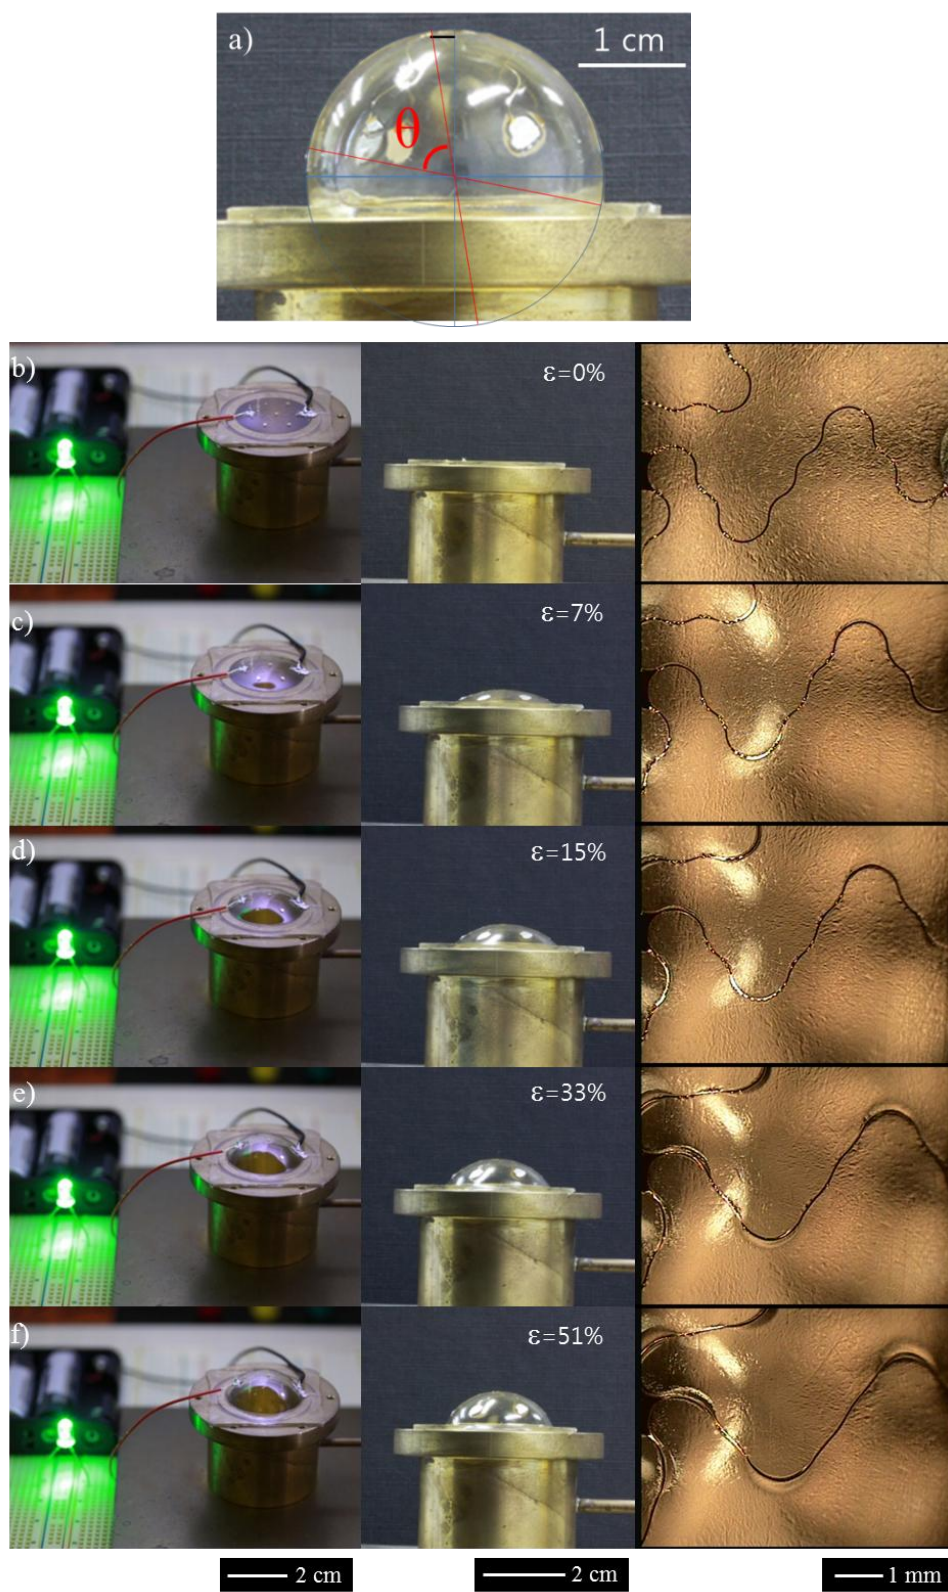

Continued on the next page

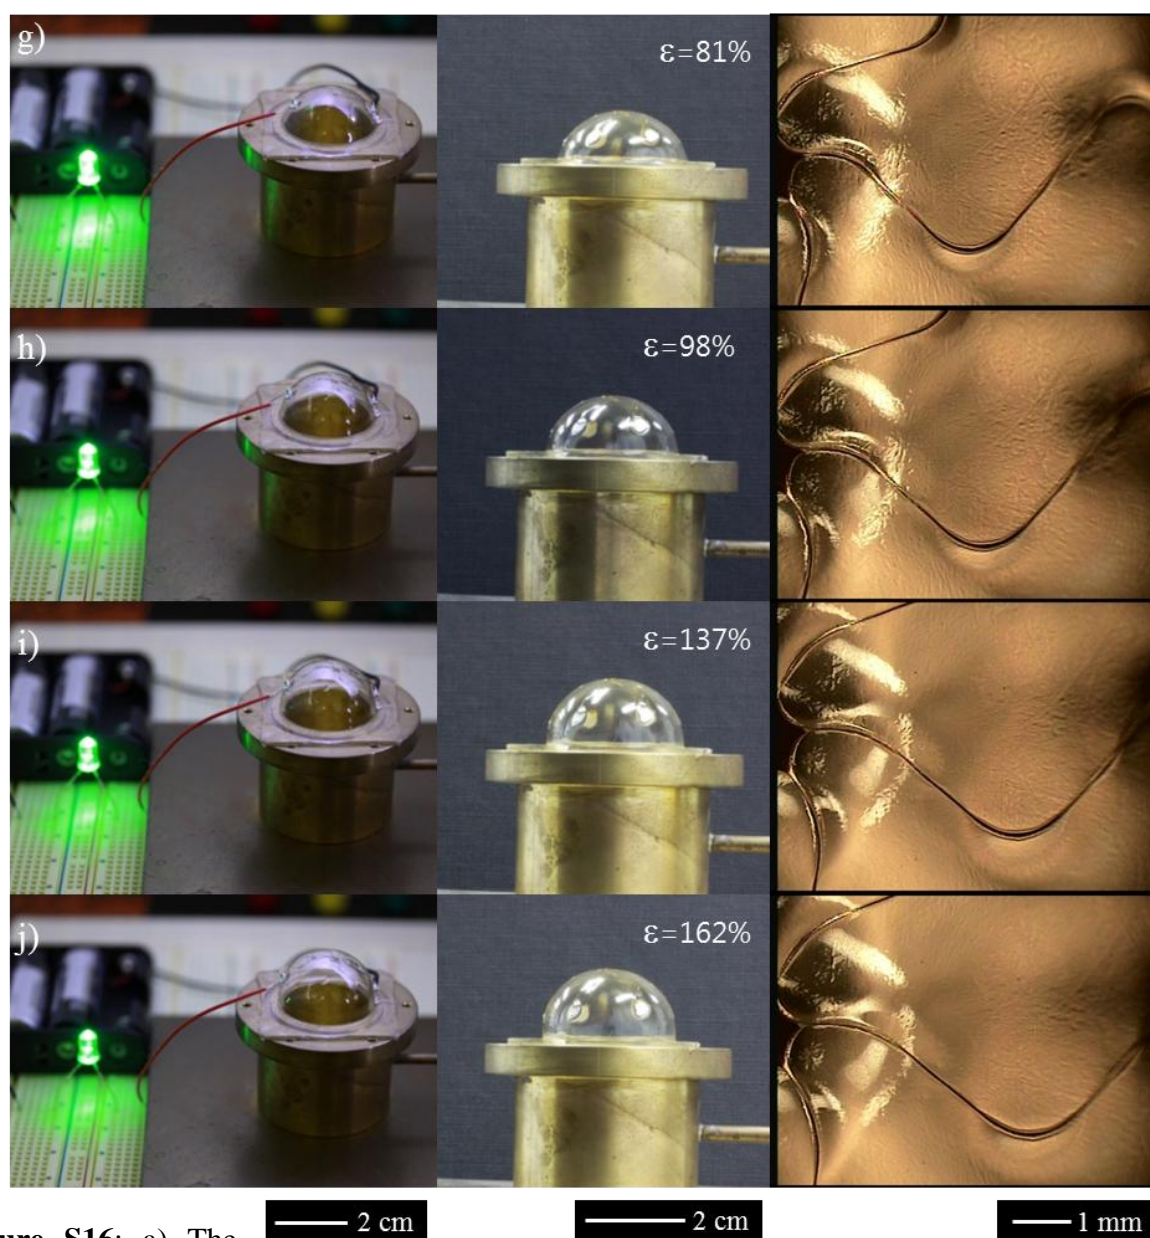

**Figure S16:** a) The strain level was measured from the contour distance between two contact pads of an ultrathin electrode. (Left column) Photographs of a test kit for electrical connection under 3-dimensional tensile strain. (Middle and right columns) Cross-sectional photographs and top-view OM images of a stretchable metal electrode under various strain levels from 0 to 162%.

**A highly flexible ultrathin serpentine metal electrode after one cycle of 3-dimensional stretching**

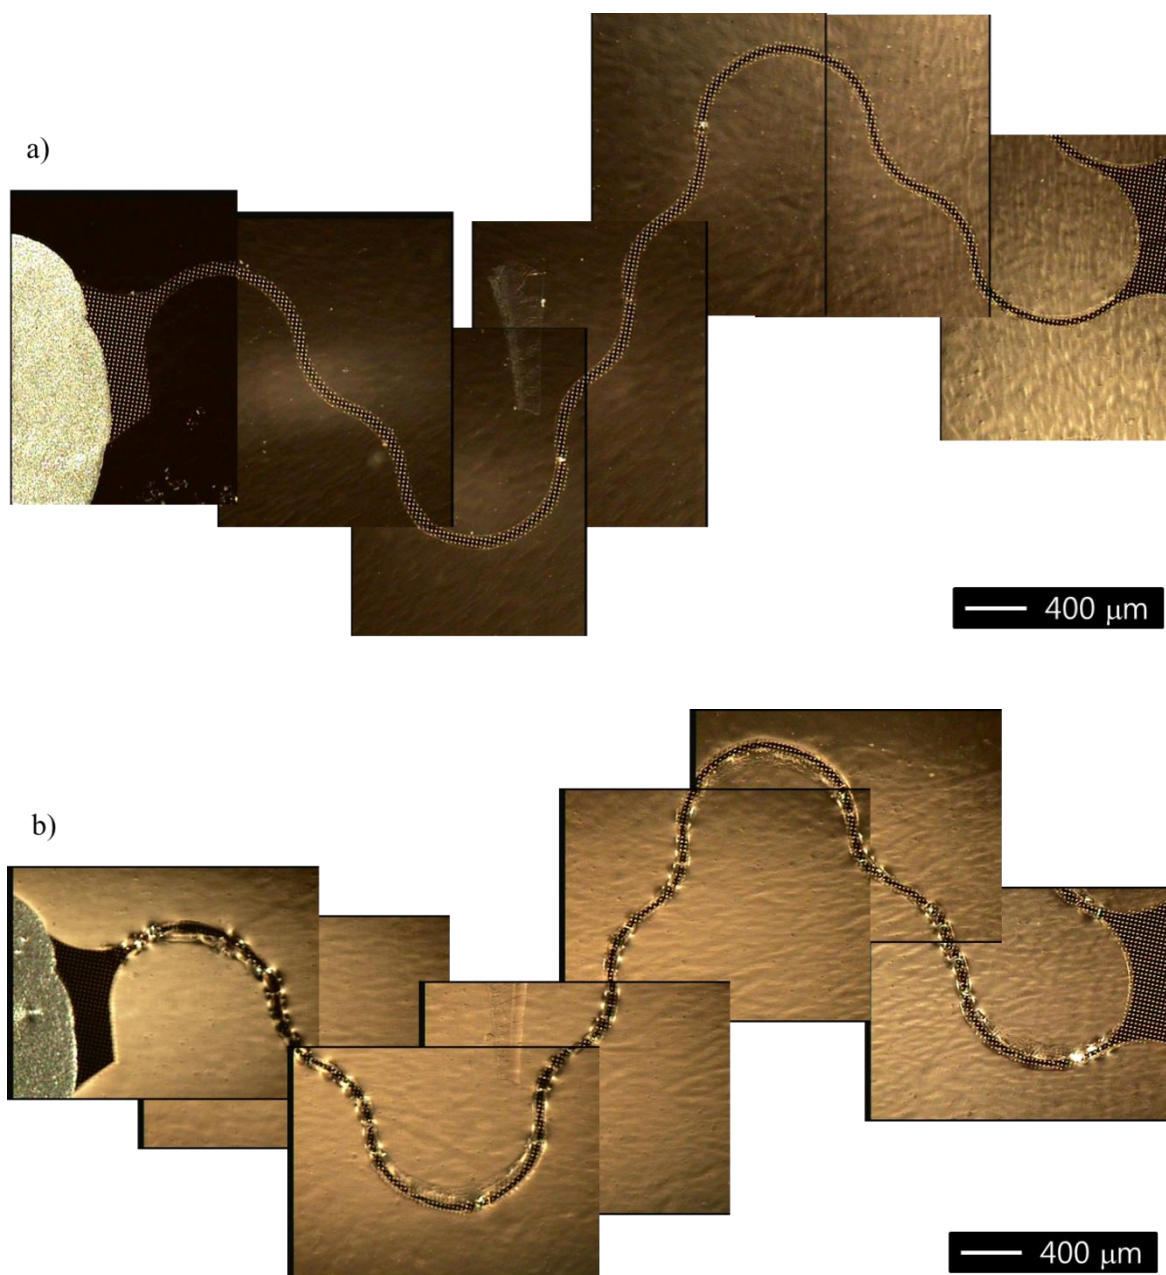

**Figure S17:** a) Tiled OM images of an ultrathin metal electrode on stretchable adhesive tape before stretching. b) Tiled OM images of the same sample after one stretching test between 51% and 0 strain.

**A highly flexible ultrathin serpentine metal electrode after 20 cycles of 3-dimensional stretching**

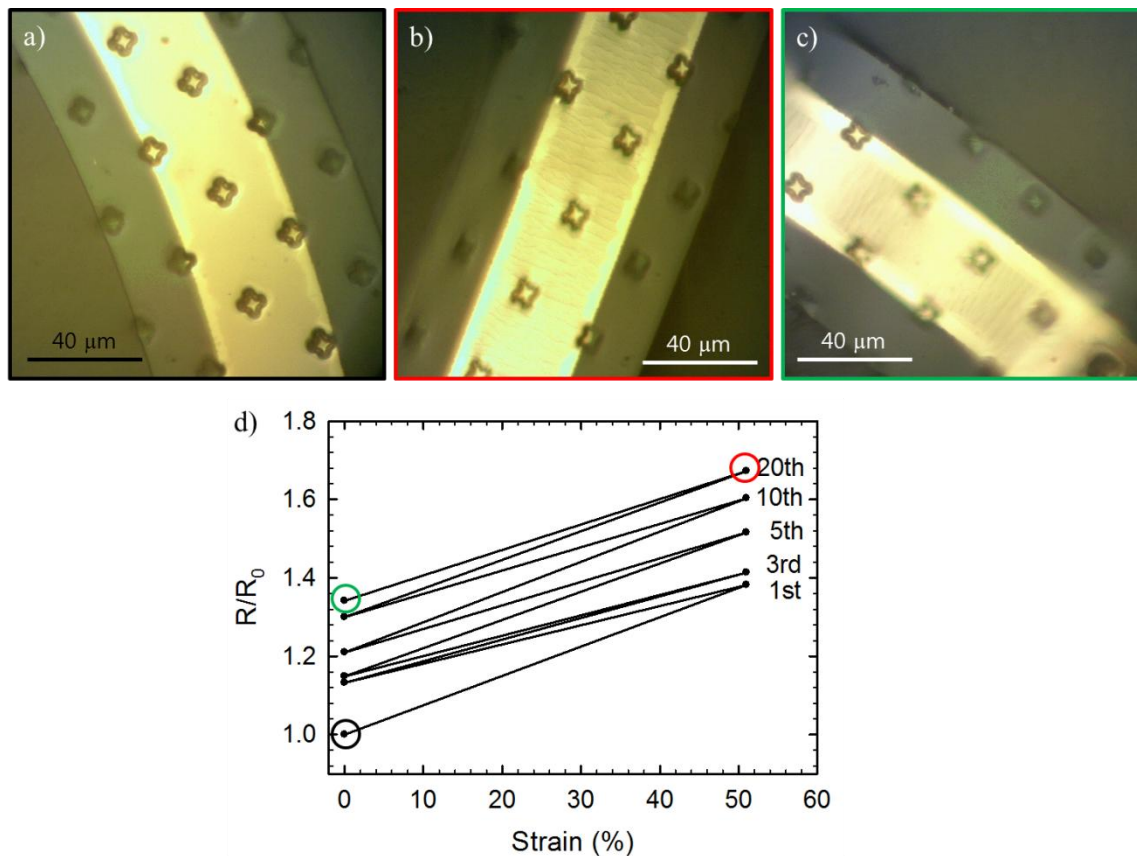

**Figure S18:** OM images of an ultrathin metal electrode a) with no strain before stretching, b) under 51% strain and c) under no strain after 20 cycles of stretching. d) Resistance ratio of the ultrathin metal electrode as a function of various strain levels. The test was conducted for 20 cycles.
